# Supplementary material for: Detection and manipulation of live antigen-expressing cells using conditionally stable nanobodies
Source: eLife. 2016 May 20;5:e15312. doi: 10.7554/eLife.15312 (PMC4922844; doi:10.7554/eLife.15312)
Supplement: Figure 2—source data 1. — This excel file contains numerical values for the % Nb-TagBFP fluorescence parameter shown as a colored heat map in Figure 2G. DOI: http://dx.doi.org/10.7554/eLife.15312.007 [file elife-15312-fig2-data1.xlsx]

## Sheet: Sheet1
			% of Nb-TagBFP fluorescence
			Nb		dNb (3maj)
			Antigen
	PDB Nb	Independent experiment	-	+	-	+
	3K1K	1	100	97.4	3.8	88.7
		2	100	86.3	2.4	60.5
		3	100	109.7	3.6	66.6
	2XV6	1	100	83.2201	1.40757	33.3768
		2	100	80.5124	3.68806	54.4558
		3	100	74.6757	2.10612	32.6143
	4EIG	1	100	80.1145	6.28641	140.963
		2	100	68.8178	5.45689	54.5455
		3	100	157.763	13.6802	179.388
	4TVS	1	100	76.7565	2.24631	45.4148
		2	100	103.851	4.23924	47.253
		3	100	64.9167	3.02375	37.6851
	4FHB	1	100	101.104	3.09051	34.4537
		2	100	123.157	1.63211	33.0702
		3	100	94.4126	2.53701	25.6119
	3K7U	1	100	137.266	2.24742	4.08213
		2	100	97.4027	0.626446	7.77274
		3	100	93.4734	1.64194	10.1877
	4QO1	1	100	73.1195	1.01769	6.183
		2	100	120.12	3.41924	30.5498
		3	100	48.9225	5.53199	11.7088
	4EIZ	1	100	99.9069	3.59987	39.9647
		2	100	93.0596	6.41108	19.3188
		3	100	157.704	6.24628	26.7995
	4GFT	1	100	103.603	0.40912	1.68526
		2	100	135.621	0.500056	1.75208
		3	100	52.3563	0.81682	3.41263
	4C57	1	100	145.176	1.94255	3.65147
		2	100	106.525	3.14026	1.59118
		3	100	55.8902	4.91907	3.33991
	Nb - nanobody. dNb (3maj) - destabilized nanobody created with 3maj mutations.
